# Supplementary material for: CD8 T Cell Score as a Prognostic Biomarker for Triple Negative Breast Cancer
Source: MDPI journal article supplement (doi:10.3390/ijms21186968), 2020-09-22
Supplement: s1 [file s1]

## SUPPLEMENTAL MATERIALS

Oshi et al. "CD8 T cell score as a prognostic biomarker for triple negative breast cancer"

### Contents

Table S1: Symbols and names of genes that constitute the CD8 T cells score.

Figure S1: Association of CD8 score with disease-specific survival in high and low *MKI67* expression of ER-positive breast cancer, and luminal A and B subtypes.

**Table S1.** Symbols and names of genes that constitute the CD8 T cells score.

| <b>Gene Symbol</b> | <b>Gene Name</b>                                         |
|--------------------|----------------------------------------------------------|
| <i>AAK1</i>        | AP2 associated kinase 1                                  |
| <i>APBB1</i>       | amyloid beta precursor protein binding family B member 1 |
| <i>ARHGEF1</i>     | Rho guanine nucleotide exchange factor 1                 |
| <i>BTN2A1</i>      | butyrophilin, subfamily 2, member A1                     |
| <i>C7orf26</i>     | chromosome 7 open reading frame 26                       |
| <i>CA6</i>         | carbonic anhydrase 6                                     |
| <i>CASP8</i>       | caspase 8                                                |
| <i>CBY1</i>        | chibby family member 1, beta catenin antagonist          |
| <i>CCDC25</i>      | coiled-coil domain containing 25                         |
| <i>CCDC53</i>      | coiled-coil domain containing 53                         |
| <i>CCR7</i>        | C-C motif chemokine receptor 7                           |
| <i>CD160</i>       | CD160 molecule                                           |
| <i>CD27</i>        | CD27 molecule                                            |
| <i>CD3D</i>        | CD3d molecule                                            |
| <i>CD7</i>         | CD7 molecule                                             |
| <i>CD8A</i>        | CD8a molecule                                            |
| <i>CD8B</i>        | CD8b molecule                                            |
| <i>CD96</i>        | CD96 molecule                                            |
| <i>CEPT1</i>       | choline/ethanolamine phosphotransferase 1                |
| <i>CIAPIN1</i>     | cytokine induced apoptosis inhibitor 1                   |
| <i>CLUAP1</i>      | clusterin associated protein 1                           |
| <i>COG2</i>        | component of oligomeric golgi complex 2                  |
| <i>COPZ1</i>       | coatamer protein complex subunit zeta 1                  |
| <i>CRTAM</i>       | cytotoxic and regulatory T cell molecule                 |
| <i>CTSW</i>        | cathepsin W                                              |
| <i>CX3CR1</i>      | C-X3-C motif chemokine receptor 1                        |
| <i>DHX15</i>       | DEAH-box helicase 15                                     |
| <i>DIDO1</i>       | death inducer-obliterator 1                              |
| <i>DNAJB1</i>      | DnaJ heat shock protein family (Hsp40) member B1         |
| <i>DPP8</i>        | dipeptidyl peptidase 8                                   |
| <i>DSC1</i>        | desmocollin 1                                            |
| <i>EEF1D</i>       | eukaryotic translation elongation factor 1 delta         |
| <i>EML3</i>        | EMAP like 3                                              |
| <i>FAM134C</i>     | family with sequence similarity 134, member C            |
| <i>FBXW4</i>       | F-box and WD repeat domain containing 4                  |
| <i>FKTN</i>        | fukutin                                                  |
| <i>FNBP4</i>       | formin binding protein 4                                 |
| <i>FTO</i>         | FTO alpha-ketoglutarate dependent dioxygenase            |

---

|                |                                                       |
|----------------|-------------------------------------------------------|
| <i>GGNBP2</i>  | gametogenetin binding protein 2                       |
| <i>GIMAP4</i>  | GTPase, IMAP family member 4                          |
| <i>GJC2</i>    | gap junction protein gamma 2                          |
| <i>GZMH</i>    | granzyme H                                            |
| <i>GZMK</i>    | granzyme K                                            |
| <i>GZMM</i>    | granzyme M                                            |
| <i>HNRNPA0</i> | heterogeneous nuclear ribonucleoprotein A0            |
| <i>HNRNPL</i>  | heterogeneous nuclear ribonucleoprotein L             |
| <i>IL16</i>    | interleukin 16                                        |
| <i>IPCEF1</i>  | interaction protein for cytohesin exchange factors 1  |
| <i>IRF3</i>    | interferon regulatory factor 3                        |
| <i>KLHL3</i>   | kelch like family member 3                            |
| <i>KLRB1</i>   | killer cell lectin like receptor B1                   |
| <i>KLRG1</i>   | killer cell lectin like receptor G1                   |
| <i>KRT2</i>    | keratin 2                                             |
| <i>LAIR2</i>   | leukocyte-associated immunoglobulin-like receptor 2   |
| <i>LSM14A</i>  | LSM14A mRNA processing body assembly factor           |
| <i>LY9</i>     | lymphocyte antigen 9                                  |
| <i>MED17</i>   | mediator complex subunit 17                           |
| <i>MKRN2</i>   | makorin ring finger protein 2                         |
| <i>MMP19</i>   | matrix metalloproteinase 19                           |
| <i>MSL3</i>    | male-specific lethal 3 homolog                        |
| <i>MTRF1</i>   | mitochondrial translation release factor 1            |
| <i>MYOM1</i>   | myomesin 1                                            |
| <i>NAA16</i>   | N(alpha)-acetyltransferase 16, NatA auxiliary subunit |
| <i>NDFIP1</i>  | Nedd4 family interacting protein 1                    |
| <i>NDUFS2</i>  | NADH:ubiquinone oxidoreductase core subunit S2        |
| <i>NFKB1</i>   | nuclear factor kappa B subunit 1                      |
| <i>NKRF</i>    | NFKB repressing factor                                |
| <i>NPAT</i>    | nuclear protein, coactivator of histone transcription |
| <i>NPRL2</i>   | NPR2 like, GATOR1 complex subunit                     |
| <i>PCNT</i>    | pericentrin                                           |
| <i>PFN2</i>    | profilin 2                                            |
| <i>PLCG1</i>   | phospholipase C gamma 1                               |
| <i>PLXDC1</i>  | plexin domain containing 1                            |
| <i>POLR3E</i>  | RNA polymerase III subunit E                          |
| <i>POP5</i>    | POP5 homolog, ribonuclease P/MRP subunit              |
| <i>PRL</i>     | prolactin                                             |
| <i>PRMT2</i>   | protein arginine methyltransferase 2                  |
| <i>PRPF4B</i>  | pre-mRNA processing factor 4B                         |
| <i>PSD</i>     | pleckstrin and Sec7 domain containing                 |
| <i>PTGDR</i>   | prostaglandin D2 receptor                             |
| <i>PTPN4</i>   | protein tyrosine phosphatase non-receptor type 4      |
| <i>PURA</i>    | purine rich element binding protein A                 |
| <i>RAPGEF6</i> | Rap guanine nucleotide exchange factor 6              |
| <i>RASA2</i>   | RAS p21 protein activator 2                           |
| <i>RBL2</i>    | RB transcriptional corepressor like 2                 |
| <i>RBM34</i>   | RNA binding motif protein 34                          |
| <i>RING1</i>   | ring finger protein 1                                 |
| <i>RNF113A</i> | ring finger protein 113A                              |
| <i>RPL37A</i>  | ribosomal protein L37a                                |
| <i>RWDD3</i>   | RWD domain containing 3                               |
| <i>S100B</i>   | S100 calcium binding protein B                        |
| <i>SDAD1</i>   | SDA1 domain containing 1                              |
| <i>SDCCAG3</i> | serologically defined colon cancer antigen 3          |
| <i>SFPQ</i>    | splicing factor proline and glutamine rich            |

---

|                 |                                               |
|-----------------|-----------------------------------------------|
| <i>SHANK1</i>   | SH3 and multiple ankyrin repeat domains 1     |
| <i>SIRPG</i>    | signal-regulatory protein gamma               |
| <i>SLC1A7</i>   | solute carrier family 1 member 7              |
| <i>SSTR3</i>    | somatostatin receptor 3                       |
| <i>TBCC</i>     | tubulin folding cofactor C                    |
| <i>TMEM41B</i>  | transmembrane protein 41B                     |
| <i>TOMM7</i>    | translocase of outer mitochondrial membrane 7 |
| <i>TRAF3IP3</i> | TRAF3 interacting protein 3                   |
| <i>TSPAN32</i>  | tetraspanin 32                                |
| <i>TTN</i>      | titin                                         |
| <i>UBE2Q1</i>   | ubiquitin conjugating enzyme E2 Q1            |
| <i>UBQLN2</i>   | ubiquilin 2                                   |
| <i>USP47</i>    | ubiquitin specific peptidase 47               |
| <i>UTP20</i>    | UTP20 small subunit processome component      |
| <i>WDR82</i>    | WD repeat domain 82                           |
| <i>YLPM1</i>    | YLP motif containing 1                        |
| <i>ZBTB11</i>   | zinc finger and BTB domain containing 11      |
| <i>ZC3HAV1</i>  | zinc finger CCCH-type containing, antiviral 1 |
| <i>ZNF154</i>   | zinc finger protein 154                       |
| <i>ZNF200</i>   | zinc finger protein 200                       |
| <i>ZNF611</i>   | zinc finger protein 611                       |
| <i>ZNF639</i>   | zinc finger protein 639                       |

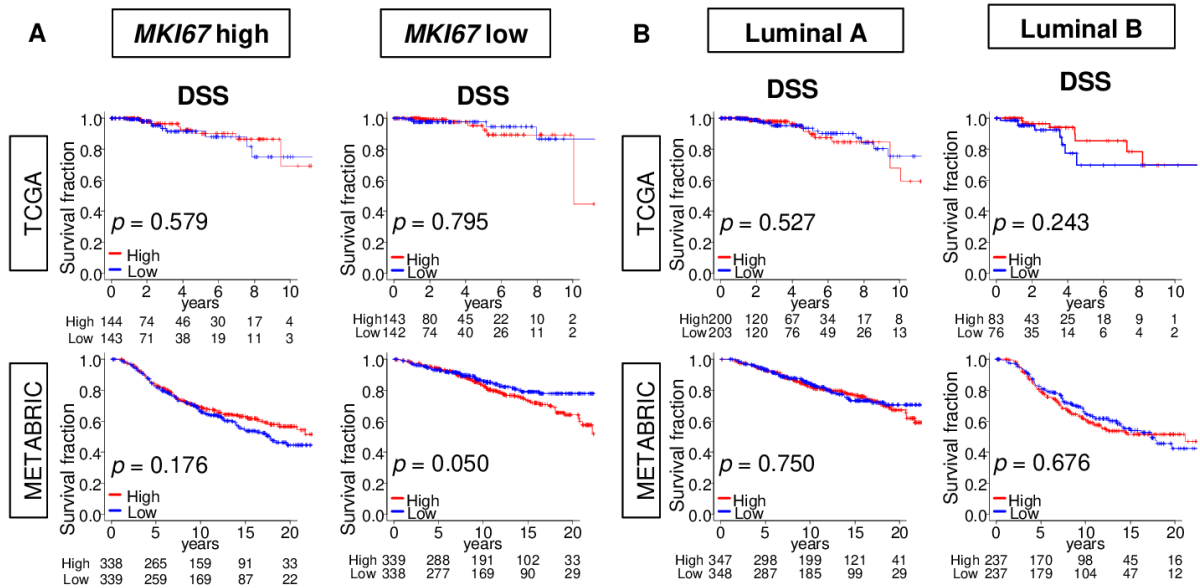

**Figure S1.** Association of CD8 score with disease-specific survival in high and low *MKI67* expression of ER-positive breast cancer, and luminal A and B subtypes. **(A)** Disease-Specific Survival (DSS) of CD8 score low (blue) vs. high (red) within *MKI67* high and low in ER-positive/HER2-negative breast cancer in both TCGA and METABRIC. **(B)** Disease-Specific Survival (DSS) of CD8 score low (blue) vs. high (red) within luminal A and luminal B in both cohorts. Kaplan-Meier survival curves with log-rank test was used to the analysis.
